# Supplementary material for: Reviews and syntheses: Biological Indicators of Oxygen Stress in Water Breathing Animals
Source: Copernicus journal article supplement (doi:10.5194/egusphere-2024-616), 2024-03-20
Supplement: Supplementary file [file egusphere-2024-616-AC2-supplement.pdf]

| Indicator Category                            | Indicator                             | Useful /Relevant Settings                  | Confounding Factors               | Expertise Required             | Resources/Accessibility                                                                                       | Overall Utility/Application                     |
|-----------------------------------------------|---------------------------------------|--------------------------------------------|-----------------------------------|--------------------------------|---------------------------------------------------------------------------------------------------------------|-------------------------------------------------|
| <b>Individual - Cellular Responses</b>        | HIF                                   | Field, Aquaculture, Lab Expt.              | species differences               | Physiology                     | access to specialized laboratory facilities                                                                   | Specialized                                     |
| <b>Individual - Sensory Systems</b>           | Vision                                | Lab Expt.                                  | Acidification                     | Physiology                     | Requires specialized tools for ERG, b (catch limits, closures) or access to specialized laboratory facilities | Not clear at this time                          |
| <b>Individual - Hormonal Responses</b>        | Hearing                               | Field, Laboratory Expt.                    | Acidification                     | Physiology/acoustics           | Immunoassay facility                                                                                          | Experimental/aquaculture                        |
|                                               | endocrine, cortisol levels            | Laboratory                                 | Handling stress                   | Physiology                     | Access to specialized laboratory facilities                                                                   | Management of fisheries stocks                  |
|                                               | growth hormone                        | Field, Aquaculture, Lab Expt.              | endocrine disruptors              | Physiology                     | Access to specialized laboratory facilities                                                                   | Fisheries management, conservation, aquaculture |
|                                               | reproduction/fertility                | Field, Aquaculture, Lab Expt.              | Size, temperature, food supply    | Physiology                     | Access to specialized laboratory facilities                                                                   | Fisheries management, conservation, aquaculture |
| <b>Individual - Growth and condition</b>      | body size                             | Field, Aquaculture, Lab Expt.              | Temperature, Food supply          | Ecological                     | sampling gear, calipers,                                                                                      | Fisheries management, conservation, aquaculture |
|                                               | malformation                          | Field, Aquaculture, Laboratory             | Acidity, food supply, temperature | Basic?                         | sampling gear, calipers,                                                                                      | Diagnostic for habitat suitability              |
|                                               | mortality                             | Field, Laboratory Expt.                    | Temperature, disease              | Basic?                         | sampling gear, calipers,                                                                                      | thresholds, improving                           |
| <b>Individual - Immune response</b>           | disease                               | Field, Aquaculture collections, Laboratory | Temperature, disease, crowding    | Pathology                      | sampling gear, calipers,                                                                                      | Diagnostic for habitat suitability              |
|                                               | chemical archive of hypoxia exposures | Field exposures                            | Growth rate                       | Trace element fingerprinting   | LA-ICPMS, Synchrotron                                                                                         | Hindcasting exposures                           |
| <b>Individual - physiology</b>                | Metabolic Indices                     | Past, present and future oceans            | Temperature                       | Ecological/Modeling            | Computer                                                                                                      | Diagnostic for habitat suitability              |
| <b>Species/Population - Abundance related</b> | Population Size                       | Field                                      | Food supply                       | Ecological                     | gear, personnel                                                                                               | Fisheries management, conservation, aquaculture |
|                                               | Growth Rate                           | Field, Aquaculture, Lab Expt.              | Temperature, Food supply          | Ecological/Modeling            | sampling gear, calipers, personnel                                                                            | thresholds, improving                           |
|                                               | Fertility                             | Field, Aquaculture, Lab Expt.              | Temperature, Food supply          | Reproductive physiology        | sampling gear, calipers, computer                                                                             | improving aquaculture                           |
|                                               | Survivorship                          | Field, Aquaculture, Lab Expt.              | Temperature, Food supply          | Ecological                     | sampling gear, calipers,                                                                                      | improving aquaculture                           |
|                                               | Recruitment rate                      | Field                                      | Temperature, Food supply          | Modeling                       | Computer                                                                                                      | improving aquaculture                           |
| <b>Species/Population - Behavior</b>          | Indicator species/taxa                | Field                                      | predation, food supply            | Taxonomic                      | Boats, ships, diving, sampling gear,                                                                          | hazard, remediation success,                    |
|                                               | Avoidance/ Walkouts                   | Field                                      | temperature                       | Field ecology, Citizen science | imaging/photography,                                                                                          | species-specific management                     |
|                                               | Aquatic surface respiration           | Field                                      |                                   | Citizen Science                | can be observed from piers or boats                                                                           | conditions: high utility as                     |
|                                               | Shoaling distributions                | Field                                      | Temperature                       | Field ecology                  | Boats, ships, depth-stratified field sampling                                                                 | management; Fisheries                           |
|                                               | Benthic emergence                     | Field, Aquaculture, Lab Expt.              | H <sub>2</sub> S                  | Field ecology                  | Scuba gear, imaging systems                                                                                   | benthic species-specific                        |
| <b>Community/Ecosystems</b>                   | Diversity                             | Field system, Mesocosms                    | Food supply, disturbance          | Taxonomic expertise            | imaging gear, balances, personnel                                                                             | management, deoxygenation                       |
|                                               | Dominance                             | Field system, Mesocosms                    | Food supply                       | Taxonomic expertise            | imaging gear, microscopes,                                                                                    | management, deoxygenation                       |
|                                               | Density                               | Field system, Mesocosms                    | Food supply, H <sub>2</sub> S     | Ecological                     | imaging gear, microscopes,                                                                                    | management, deoxygenation                       |
|                                               | Biomass                               | Field, Aquaculture, Lab Expt.              | Food supply                       | Ecological                     | imaging gear, balances, calipers,                                                                             | management, deoxygenation                       |
|                                               | Taxonomic composition                 | Field system, Mesocosm                     | Contaminants                      | /or molecular expertise        | Microscopes, Image analysis, eDNA                                                                             | management,                                     |
|                                               | Taxonomic ratios                      | Field system, Mesocosm                     | Contaminants                      | Low-level taxonomic expertise  | Microscopes, Image analysis, eDNA                                                                             | detection; co-management of                     |
|                                               | Functional Shifts                     | Field system                               | Food supply                       | Low-level taxonomic expertise  | literature access                                                                                             | deoxygenation detection; co-                    |
|                                               | Trophic Structure                     | Field system                               | Food supply                       | Isotopic, Gut, Modeling        | dissecting tools for gut contents,                                                                            | management of cumulative                        |
